# Supplementary material
Source: PubMed Central journal article supplement (PMC7658885)
Supplement: 19-01270.pdf [file 19-01270.pdf]

**On-line Table: Parameter estimates of linear regression models for individual readers<sup>a</sup>**

| fTMSi    | CHD (vs Control)            | GA (per week)         | Female (vs Male)     |
|----------|-----------------------------|-----------------------|----------------------|
| Reader 1 | -1.1 (-1.7 to -0.5) (<.001) | 1.4 (1.3-1.6) (<.001) | 0.1 (-0.4-0.7) (.59) |
| Reader 2 | -0.8 (-1.4 to -0.2) (.01)   | 1.4 (1.3-1.6) (<.001) | 0.5 (-0.1-1.0) (.10) |

<sup>a</sup> Values are  $\beta$ -estimates (95% confidence interval) (*P* value).
